# Supplementary material for: Non-volatile organic ferroelectric memory transistors fabricated using rigid polyimide islands on an elastomer substrate
Source: Royal Society of Chemistry journal article supplement (doi:10.1039/c6tc00083e), 2016-01-01
Supplement: c6tc00083e1.pdf [file c6tc00083e1.pdf]

Electronics Supplementary Information

**Non-volatile organic ferroelectric memory transistor using rigid polyimide islands on elastomer substrate**

Soon-Won Jung,<sup>a\*</sup> Jae Bon Koo,<sup>a</sup> Chan Woo Park,<sup>a,b</sup> Bock Soon Na,<sup>a</sup> Nae-Man Park,<sup>a</sup> Ji-Young Oh,<sup>a</sup> Yu Gyeong Moon,<sup>a,b</sup> and Sang Seok Lee<sup>a</sup> Lee,<sup>a</sup> and Kyung-Wan Koo<sup>c</sup>

<sup>a</sup> ICT Materials and Components Research Laboratory, Electronics and Telecommunication Research Institute (ETRI), Daejeon 34129, Republic of Korea. E-mail: swjung0582@gmail.com; Fax +82 42-860-6386

<sup>b</sup> Department of Advanced Device Technology, Korea University of Science and Technology (UST), Daejeon 34113, Republic of Korea

<sup>c</sup> Department of Defense Science and Technology, Hoseo University, Asan 336-795, Republic of Korea.

E-mail: swjung0582@gmail.com

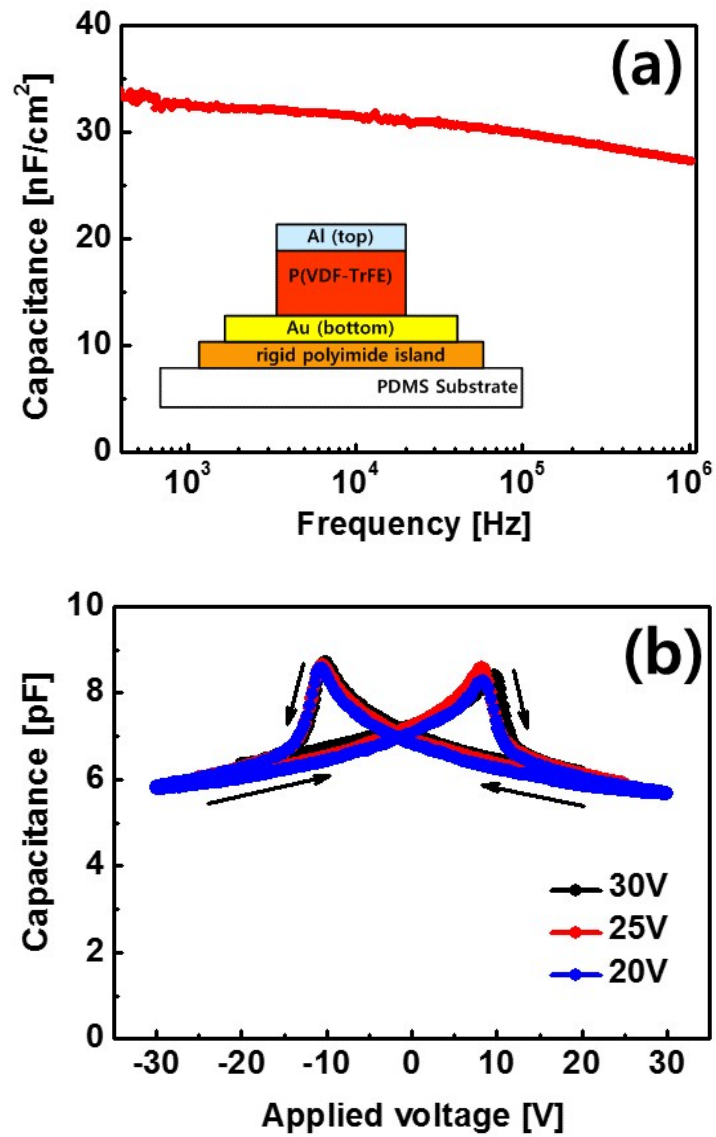

Figure S1. (a) Capacitance–frequency and (b) capacitance–voltage characteristics of the P(VDF-TrFE) capacitor fabricated on a rigid polyimide/PDMS substrate.

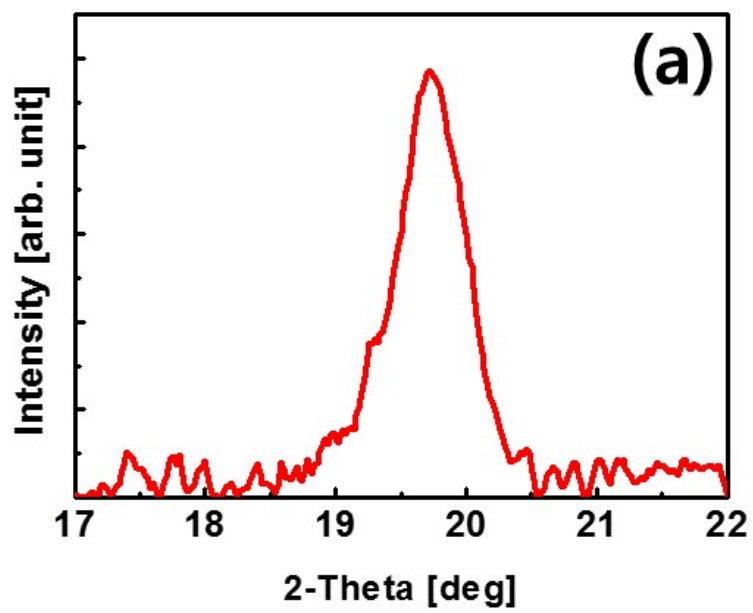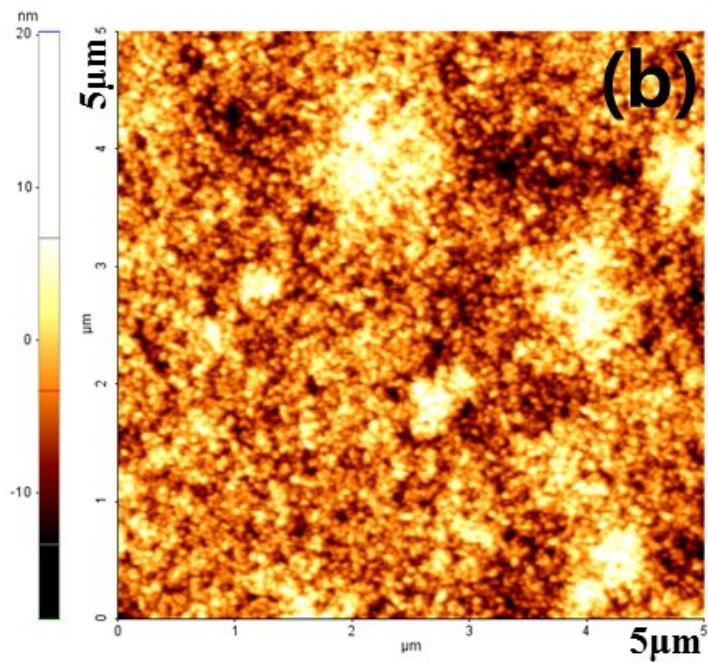

Figure S2. (a) X-ray diffraction (XRD) patterns, and (b) atomic force microscopy (AFM) image of the P(VDF-TrFE) thin film on rigid polyimide islands on elastomer substrate.

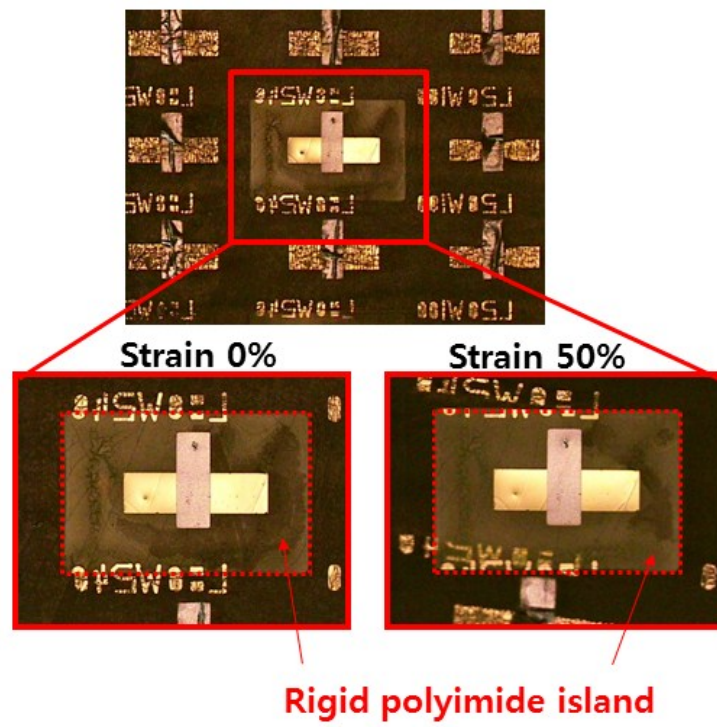

Figure S3. Optical images of uniaxially stretched OFMTs at strains of 0% and 50%.

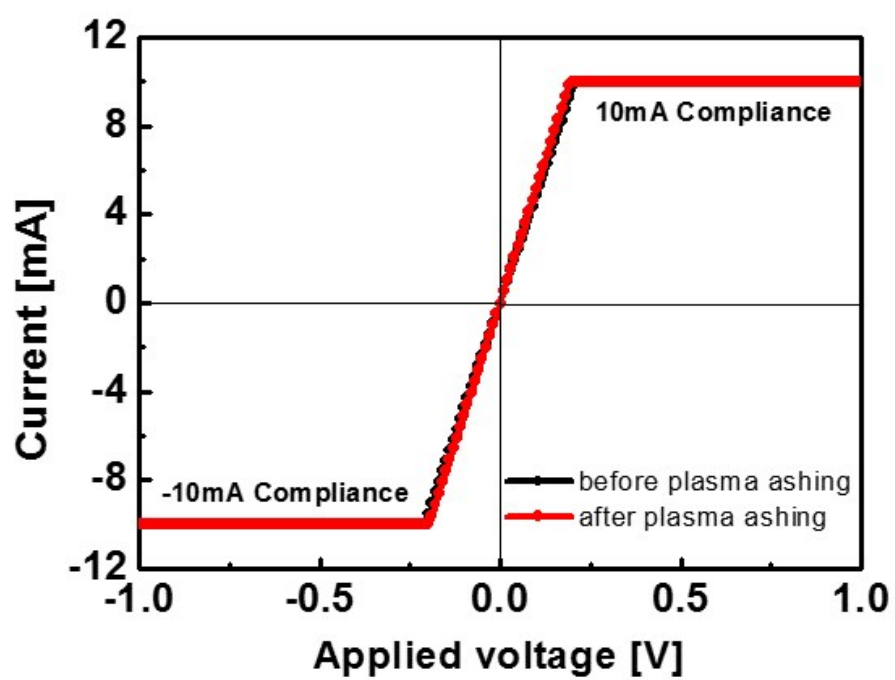

Figure S4. Current–voltage characteristics of the Al gate electrode of the OFMT fabricated on a rigid polyimide/PDMS substrate.

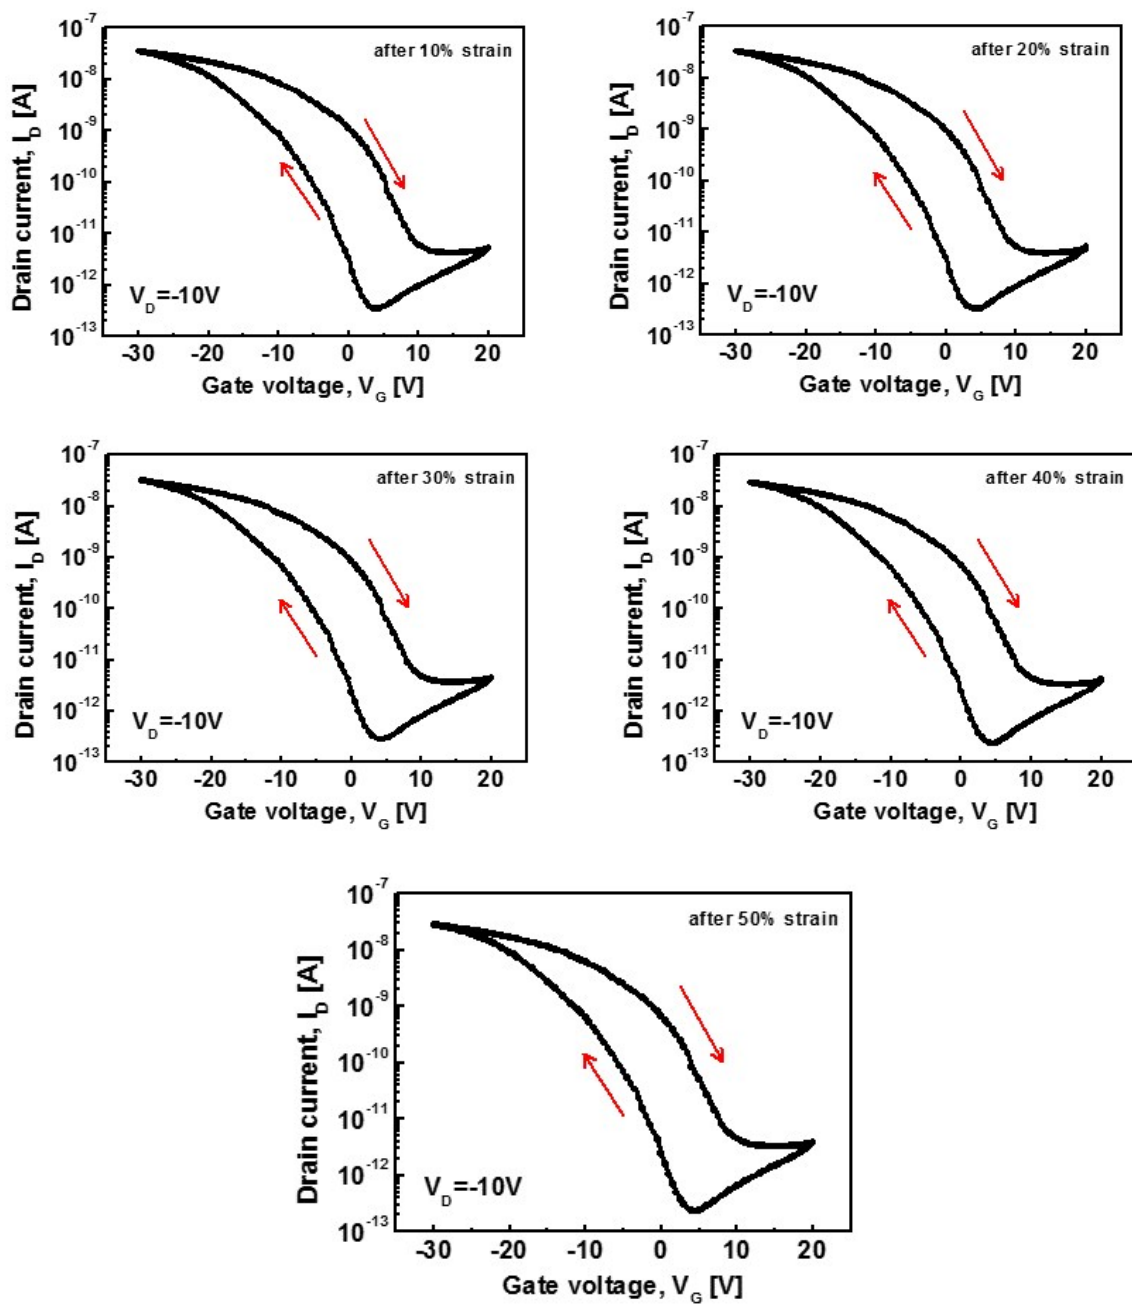

Figure S5. Transfer curves after the stretch.

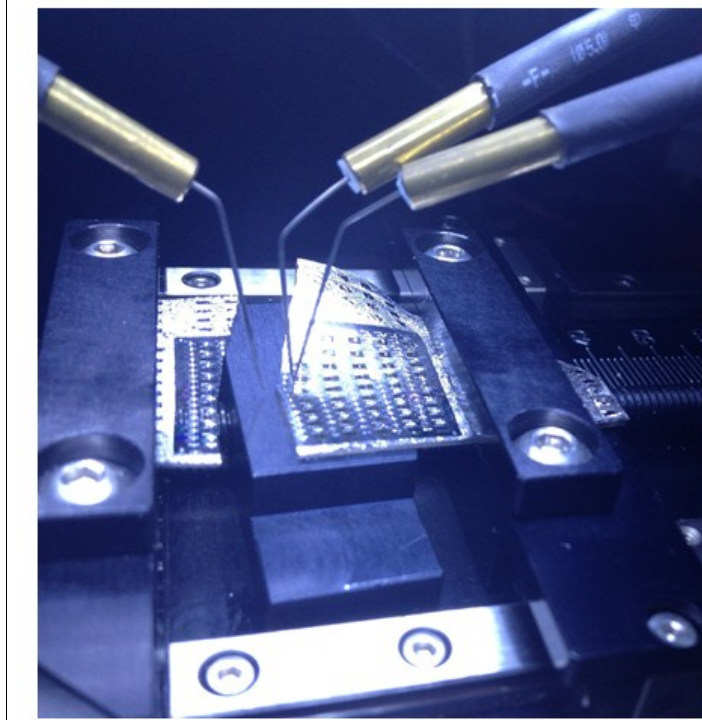

Figure S6. Optical image of uniaxially stretched OFMTs at strain of 55%.
